# Supplementary material
Source: PubMed Central journal article supplement (PMC1942136)
Supplement: gut_2006.095109_1.pdf [file gut_2006.095109_1.pdf]

# Appendix 1 - parametric and structural assu

## General

|                                               |                        |
|-----------------------------------------------|------------------------|
| Author                                        | Tappenden et al        |
| Year of publication                           | 2006                   |
| Modelling methodology (as described in paper) | State transition model |
| Cycle length                                  | 1 year                 |
| Primary measure of clinical benefit           | QALYs gained           |
| Perspective                                   | UK NHS                 |
| Start age for simulation cohort               | 30 years               |
| Time horizon                                  | Until dead             |
| Stopping age for screening/surveillance       | 80                     |
| Discount rate for costs                       | 3.5%                   |
| Discount rate for health outcomes             | 3.5%                   |

## Primary screening modalities included in evaluation

|               |     |
|---------------|-----|
| FOBT options? | Yes |
| FSIG options? | Yes |
| DCBE options? | No  |
| COL options?  | No  |

## Natural history assumptions (baseline)

|                                                        |                                  |
|--------------------------------------------------------|----------------------------------|
| Proportion of cancers arising from prior adenoma       | 100%                             |
| Health state definitions                               | Normal epithelium, Low risk      |
| Separate health states for distal and proximal bowel   | Yes                              |
| Adenoma/CRC prevalence at model start                  | 0% at age 30.                    |
| TP Normal to adenoma                                   | Age dependent. Based on €        |
| TP Normal to CRC (de novo)                             | N/a                              |
| TP Low-risk to high-risk adenoma                       | 0.02                             |
| TP High-risk to CRC                                    | 0.03                             |
| TP CRC progression                                     | Dukes' A-B (0.58), Dukes' E      |
| Probability of cancer diagnosis                        | Dukes' A (0.07), Dukes' B (0.07) |
| Probability of cancer death                            | Dukes' A (0), Dukes' B (0.07)    |
| Higher recurrence rates given history of prior adenoma | Yes                              |

## Treatment assumptions

|                                               |     |
|-----------------------------------------------|-----|
| Polypectomy undertaken at point of screening? | Yes |
|-----------------------------------------------|-----|

## Test characteristics (baseline)

|                                                       |                                  |
|-------------------------------------------------------|----------------------------------|
| Unhydrated FOBT sensitivity (low risk/small adenoma)  | 0.05                             |
| Unhydrated FOBT sensitivity (high risk/large adenoma) | 0.05                             |
| Unhydrated FOBT sensitivity (cancer)                  | 0.41                             |
| Unhydrated FOBT specificity                           | 0.985                            |
| Rehydrated FOBT sensitivity (low risk/small adenoma)  | N/a                              |
| Rehydrated FOBT sensitivity (high risk/large adenoma) | N/a                              |
| Rehydrated FOBT sensitivity (cancer)                  | N/a                              |
| Rehydrated FOBT specificity                           | N/a                              |
| Proportion of bowel visualised by FSIG                | N/a. Left and right sided polyps |
| FSIG sensitivity (low risk/small distal adenoma)      | 0.76                             |
| FSIG sensitivity (high risk/large distal adenoma)     | 0.97                             |
| FSIG sensitivity (distal cancer)                      | 0.97                             |
| FSIG specificity                                      | 1                                |
| COL sensitivity (low risk/small adenoma)              | 0.76                             |
| COL sensitivity (high risk/large adenoma)             | distal = 0.97, proximal = 0.97   |
| COL sensitivity (cancer)                              | distal = 0.97, proximal = 0.97   |

|                                                      |                              |
|------------------------------------------------------|------------------------------|
| COL specificity                                      | 1.00                         |
| DCBE sensitivity (low risk/small adenoma)            | N/a                          |
| DCBE sensitivity (high risk/large adenoma)           | N/a                          |
| DCBE sensitivity (cancer)                            | N/a                          |
| DCBE specificity                                     | N/a                          |
| <b>Follow up assumptions</b>                         |                              |
| Follow-up schedule modelled                          | 3-yearly COL for high-risk p |
| <b>Participation</b>                                 |                              |
| Compliance rate for screening                        | 60%                          |
| Compliance rate for follow-up                        | 80%                          |
| Was compliance modelled as independent of previous p | Yes                          |
| <b>Health outcome valuation</b>                      |                              |
| Health state definitions (utility values)            | No cancer (0.91), Dukes' A   |
| <b>Sensitivity analysis</b>                          |                              |
| Description of simple sensitivity analyses           | Discount rates, screening a  |
| Was probabilistic sensitivity analysis undertaken?   | Monte carlo sensitivity anal |
| <b>Calibration/validation methods</b>                |                              |
| Methods for calibration                              | Ranges informed by literatu  |
| <b>Costs</b>                                         |                              |
| Cost of FOBT (single test)                           | £11.74                       |
| Cost of FSIG                                         | £51.60                       |
| Cost of DCBE                                         | N/a                          |
| Cost of COL                                          | £188.40                      |
| Cancer treatment costs                               | Dukes' A (£8,299.24), Duke   |

## Assumptions used within previous CRC screening models

| Neilson et al                          | Sonnenberg et al                         | Frazier et al                                                    |
|----------------------------------------|------------------------------------------|------------------------------------------------------------------|
| 2003                                   | 2002                                     | 2000                                                             |
| Markov model                           | Markov process                           | Markov model                                                     |
| 1 year                                 | 1 year                                   | 1 year                                                           |
| QALYs gained                           | Life years saved                         | Life years gained                                                |
| UK NHS                                 | US third-party payer                     | US societal                                                      |
| 50 years                               | 50 years                                 | 50 years                                                         |
| Until dead                             | Until dead                               | Until dead                                                       |
| Not reported                           | Not reported                             | 85                                                               |
| 6.0%                                   | 3.0%                                     | 3.0%                                                             |
| 1.5%                                   | 3.0%                                     | 3.0%                                                             |
| Yes                                    | Yes                                      | Yes                                                              |
| No                                     | Yes                                      | Yes                                                              |
| No                                     | No                                       | Yes                                                              |
| No                                     | Yes                                      | Yes                                                              |
| 100%                                   | Not reported                             | 100%                                                             |
| Polyp/cancer free, low risk polyps     | CRC, status after FOBT, status           | Low risk adenoma, high risk adenoma                              |
| No                                     | No                                       | Yes                                                              |
| 0.26                                   | Taken from 2 autopsy studies.            | 21% adenoma prevalence at age 60                                 |
| 0.01                                   | 0.01                                     | Logistic regression based on 6 adenomas                          |
| N/a                                    | N/a                                      | N/a                                                              |
| 0.02                                   | N/a                                      | 0.02                                                             |
| 0.05                                   | N/a                                      | 0.05                                                             |
| Dukes' A/B to Dukes C/D (0.4)          | N/a                                      | Localized-regional CRC (0.28), Localized (0.25), Regional (0.55) |
| Dukes' A/B (0.25), Dukes' C/D (0.002)  | N/a                                      | Localized (0.25), Regional (0.55)                                |
| Dukes' A/B (0.002), Dukes' C/D (0.002) | Without screening, 40% CRCs are detected | Localized (0.002), Regional (0.002)                              |
| Yes                                    | N/a                                      | Yes                                                              |
| Yes                                    | Yes                                      | Yes                                                              |
| 0.1                                    | N/a. Only CRC is modelled as "t0.1       |                                                                  |
| 0.1                                    | N/a. Only CRC is modelled as "t0.1       |                                                                  |
| 0.33                                   | 0.40                                     | 0.33                                                             |
| 0.97                                   | 0.975                                    | 0.97                                                             |
| N/a                                    | N/a                                      | 0.1                                                              |
| N/a                                    | N/a                                      | 0.1                                                              |
| N/a                                    | N/a                                      | 0.6                                                              |
| N/a                                    | N/a                                      | 0.9                                                              |
| N/a                                    | 45% detectable by FSIG                   | N/a. Left and right sided polyps                                 |
| N/a                                    | N/a                                      | 0.85                                                             |
| N/a                                    | N/a                                      | 0.95                                                             |
| N/a                                    | N/a                                      | 0.95                                                             |
| N/a                                    | N/a                                      | 1                                                                |
| 0.85                                   | N/a                                      | 0.85                                                             |
| 0.95                                   | N/a                                      | 0.95                                                             |
| 0.95                                   | N/a                                      | 0.95                                                             |

|     |     |      |
|-----|-----|------|
| 1   | N/a | 1    |
| N/a | N/a | 0.3  |
| N/a | N/a | 0.5  |
| N/a | N/a | 0.7  |
| N/a | N/a | 0.86 |

3-yearly COL for high-risk patient Colonoscopy undertaken every 3-yearly COL for high-risk patient

|                                  |                              |     |
|----------------------------------|------------------------------|-----|
| 60%                              | 100%                         | 60% |
| 80%                              | 100%                         | 80% |
| Yes. Fall in participation model | Complete compliance assumed. | Yes |

Adjustment for quality of life of 0 N/a N/a

FOBT compliance rates, follow-up FOB test characteristics, FOBT All natural history parameters vs  
No No No

Natural history parameters base None reported. Natural history calibrated against

|                                                      |             |                                     |
|------------------------------------------------------|-------------|-------------------------------------|
| £5                                                   | US \$3.50   | US \$38                             |
| N/a                                                  | US \$400.56 | US \$279 (\$564 with polypectomy)   |
| N/a                                                  | N/a         | US \$296                            |
| £127 (£138 with polypectomy)                         | US \$695.95 | US \$1012 (\$1519 with polypectomy) |
| Screen-detected: Dukes' A/B (£: Value not reported.) |             | Localized CRC (\$22,000) Regional   |

# dels

| Vijan et al                      | Ladabaum et al                     | Khandker et al                    |
|----------------------------------|------------------------------------|-----------------------------------|
| 2001                             | 2001                               | 2000                              |
| Markov decision model            | Markov model                       | (Dynamic) state transition mode   |
| Not reported                     | 1 year                             | Not clearly reported. First 20 ye |
| Life years saved                 | Life years gained                  | Life years gained                 |
| US third-party payer             | US third-party payer               | Not reported                      |
| 50 years                         | 50 years                           | 50                                |
| Lifetime                         | 30 years (Until age 80)            | Until dead                        |
| Unclear                          | 80                                 | 85                                |
| 3.0%                             | 3.0%                               | 3.0%                              |
| 3.0%                             | 3.0%                               | 3.0%                              |
| Yes                              | Yes                                | Yes                               |
| Yes                              | Yes                                | Yes                               |
| No                               | No                                 | Yes                               |
| Yes                              | Yes                                | Yes                               |
| 75%                              | 90%                                | 100%                              |
| Not clear. Appears to be normal  | Normal, polyp, cancer (localized   | Disease-free, hyperplastic polyp  |
| No                               | No                                 | Yes                               |
| 0.2 adenoma prevalence           | Prevalences at age 50: adenom      | 25% adenoma prevalence at ag      |
| Incidence rates based on 5 auto  | Age and gender specific, based     | Based on models by Whynes ar      |
| Not reported                     | Age and gender specific, based     | N/a                               |
| N/a                              | N/a                                | N/a                               |
| 10-year "dwell time" to CRC for  | Age and gender specific, based     | Rates for malignant transformati  |
| 2 years for progression through  | 2-year sojourn time in local, regi | Transition from local to regional |
| Disseminated cancer assumed      | Local (0.22/year over 2 years), r  | Patients with advanced stages v   |
| Localised (0.105), regional (0.3 | Local (0.0174/year in first 5 year | Based on SEER data, values nc     |
| Yes                              | Not reported                       | Yes                               |
| Yes                              | Yes                                | Yes                               |
|                                  | 0.05 0.1                           | 0.06                              |
|                                  | 0.05 0.1                           | 0.1                               |
| Localized cancer (0.30), region: | 0.4                                | 0.6                               |
|                                  | 0.975 0.92                         | 0.92                              |
| N/a                              | N/a                                | N/a                               |
| 55% neoplasia detectable by FS   | 50%                                | N/a                               |
| 0.85                             | 0.9                                | 0.73                              |
| 0.85                             | 0.9                                | 0.97                              |
| 0.95                             | 0.9                                | 0.97                              |
| Not reported                     | 0.95                               | 0.92                              |
| 0.85                             | 0.9                                | 0.79                              |
| 0.85                             | 0.9                                | 0.85                              |
| 0.95                             | 0.95                               | 0.97                              |

|              |              |      |
|--------------|--------------|------|
| Not reported | Not reported | 1    |
| N/a          | N/a          | 0.67 |
| N/a          | N/a          | 0.82 |
| N/a          | N/a          | 0.84 |
| N/a          | N/a          | 0.75 |

3-yearly colonoscopy for patient Surveillance colonoscopy every Based on Winawer (1997). Dep

|                           |                                                          |
|---------------------------|----------------------------------------------------------|
| 25% to 100% in base case. | 25% in base case. 75% and 100% assumed in base case. 25% |
| 25% to 100% in base case. | Not reported 100% assumed in base case                   |
| Yes                       | No. Patients either comply with : Not reported           |

|     |     |     |
|-----|-----|-----|
| N/a | N/a | N/a |
|-----|-----|-----|

|                                        |                                                              |                                  |
|----------------------------------------|--------------------------------------------------------------|----------------------------------|
| One- to three-way sensitivity analysis | Varying assumptions concerning Monte Carlo sampling was used | Focussed on key parameters of No |
|----------------------------------------|--------------------------------------------------------------|----------------------------------|

Model outputs validated against Matched against SEER data. Model Not reported

|                                   |                                   |                                   |
|-----------------------------------|-----------------------------------|-----------------------------------|
| US \$17                           | \$10                              | US \$11 - Under 65 / US \$7 - Ov  |
| US \$225 (\$240 with biopsy)      | \$206 (\$377 with biopsy)         | US \$176 - Under 65 / US \$94 - ( |
| N/a                               | N/a                               | US \$176 - Under 65 / US \$175 -  |
| US \$550 (plus \$215 if polypecto | \$623 (\$901 with biopsy)         | US \$670 - Under 65 / US \$438 -  |
| Localized CRC (\$60,000) Regio    | Local (\$24,000) Regional (\$31,0 | Based on Fireman (Health Care     |

| Loeve et al                          | Ness et al                        | Whynes et al                                  |
|--------------------------------------|-----------------------------------|-----------------------------------------------|
| 2000                                 | 2000                              | 1998                                          |
| Microsimulation model                | Discrete event simulation model   | Semi-Markov                                   |
| N/a                                  | N/a                               | Annual                                        |
| Presented as cost consequence        | QALYs gained                      | QALYs gained                                  |
| US private-healthcare provider (     | US societal                       | UK NHS                                        |
| 50                                   | 40 years                          | 50                                            |
| Until dead                           | Until dead                        | Model allows for simulation to continue until |
| Screening options include possi      | Not reported                      | 74                                            |
| 3.0%                                 | 3.0%                              | 6.0%                                          |
| 3.0%                                 | 3.0%                              | 6.0%                                          |
| No                                   | No                                | Yes                                           |
| Yes                                  | No                                | No                                            |
| No                                   | No                                | No                                            |
| Yes                                  | Yes                               | No                                            |
| 100%                                 | 100%                              | 83%                                           |
| No lesion, adenoma ≤5mm, ade         | N/a. Steps defined as normal tis  | Healthy, adenoma, early asymptomatic CRC      |
| Specific site of lesion modelled     | Yes                               | No                                            |
| Simulated adenoma prevalence         | 0%                                | No                                            |
| See above                            | Defined by piecewise age-deper    | Based on Nottingham trial. Values not repor   |
| N/a                                  | Dependent on age, sex, pre-det    | Based on Nottingham trial. Values not repor   |
| Based on SEER data. Size distr       | Dependent on age, sex, pre-det    | N/a                                           |
| Mean sojourn time of 20 years.       | Dependent on age, sex, pre-det    | Progressive polyps assumed to take 15 yea     |
| Mean duration of cancer in prec      | Dependent on age, sex, pre-det    | Based on Nottingham trial. Values not repor   |
| Total average diagnosis of 3.6 y     | Time to emergence of symptom:     | Cancer diagnosis assumed to take 2 years      |
| Based on SEER data. Values not       | Based on survival curves from S   | Based on Nottingham trial. Values not repor   |
| Not reported                         | Unclear                           | Based on Nottingham trial. Values not repor   |
| After positive test, all lesions are | Yes                               | Yes, as done within the Nottingham trial pro  |
| N/a                                  | N/a                               | N/a                                           |
| N/a                                  | N/a                               | FOBT assumed to detect true progressive a     |
| N/a                                  | N/a                               | Value not reported.                           |
| N/a                                  | N/a                               | Value not reported.                           |
| N/a                                  | N/a                               | Value not reported.                           |
| N/a                                  | N/a                               | Value not reported.                           |
| N/a                                  | N/a                               | Value not reported.                           |
| N/a                                  | N/a                               | Value not reported.                           |
| Based on Kaiser Permanente d         | N/a                               | N/a                                           |
| 75% in adenomas ≤5mm. 85% i          | N/a                               | N/a                                           |
| 95% in adenomas ≥10mm.               | N/a                               | N/a                                           |
| 95%                                  | N/a                               | N/a                                           |
| Specificity not reported             | N/a                               | N/a                                           |
| 80% in adenomas ≤5mm. 85% i          | .75 (small polyps)                | Value not reported.                           |
| 95% in adenomas ≥10mm.               | 0.8 (intermediate polyps), 0.85 i | Value not reported.                           |
| 95%                                  | 0.95                              | Value not reported.                           |

|                          |                              |                     |
|--------------------------|------------------------------|---------------------|
| Specificity not reported | 30% colonoscopies assumed to | Value not reported. |
| N/a                      | N/a                          | N/a                 |

Persons in whom adenomas gre 3-yearly COL for high risk, 5-yeε Not reported in paper.

|              |              |                                             |
|--------------|--------------|---------------------------------------------|
| 100%         | Not reported | Based on the Nottingham trial. Basecase va  |
| 100%         | Not reported | Based on the Nottingham trial. Basecase va  |
| Not reported | Not reported | Decline in compliance modelled in line with |

|     |                                  |                                            |
|-----|----------------------------------|--------------------------------------------|
| N/a | No cancer (0.91), Local colon cε | Taken from Whyne et al (Quality of Life Re |
|-----|----------------------------------|--------------------------------------------|

|                                    |                                  |                                                 |
|------------------------------------|----------------------------------|-------------------------------------------------|
| Dwelling time probability distribu | One-way sensitivity analysis var | 5 simulations including empirical trial results |
| No.                                | No                               | No                                              |

Structural and parametric assum Model fitted against SEER CRC Not reported. Based on Nottingham trial.

|                                 |                                     |                                              |
|---------------------------------|-------------------------------------|----------------------------------------------|
| N/a                             | N/a                                 | Taken from Walker et al (Journal of Clinical |
| US \$100                        | N/a                                 | Taken from Walker et al (Journal of Clinical |
| N/a                             | N/a                                 | Taken from Walker et al (Journal of Clinical |
| US \$300 (\$400 with polypectom | \$303 (plus \$159 for polypectom)   | Taken from Walker et al (Journal of Clinical |
| Costs for primary cancer treatm | Initial costs: Local (\$16,051), Re | Taken from Whyne et al (British Journal of   |



age 90

C, late asymptomatic CRC, early symptomatic CRC, late symptomatic CRC, screen-detected preclinical

rted  
rted

irs to develop to early-stage colorectal cancer.

rted  
following early-stage colorectal cancer onset  
rted  
rted

rtocol.

adenoma with a probability of 20%.

Value not reported.  
Value not reported.  
Nottingham trial.

(Search, 1994). Health utility values not reported.

s, adjusted UK age/sex distribution, lifetime costs, compliance rates. Further sensitivity analysis explorin

Oncology, 1991). Values not reported  
Cancer, 1993). Values not reported

I disease, preclinical disease, clinical disease, death - other causes, death CRC

ig impact of increasing cost of FOBT test, increasing colonoscopy cost, different costs for early- and late



3-stage colorectal cancer, annual screening options, lower survival differences between early- and late-



stage cancers, increased FOBT sensitivity and decreased FOBT specificity
